# Supplementary material for: Phase-controlled Fourier-transform spectroscopy
Source: PubMed Central journal article supplement (PMC6202327; doi:10.1038/s41467-018-06956-x), 2018-10-25
Supplement: 41467_2018_6956_MOESM1_ESM.pdf [file 41467_2018_6956_MOESM1_ESM.pdf]

# Supplementary Information: Phase-controlled Fourier-transform spectroscopy

Kazuki Hashimoto<sup>1,2</sup>, Takuro Ideguchi<sup>1,3\*</sup>

<sup>1</sup>Department of Physics, The University of Tokyo, Tokyo 113-0033, Japan

<sup>2</sup>Aeronautical Technology Directorate, Japan Aerospace Exploration Agency, Tokyo 181-0015, Japan

<sup>3</sup>PRESTO, Japan Science and Technology Agency, Tokyo 113-0033, Japan

\*ideguchi@phys.s.u-tokyo.ac.jp

## Supplementary Note 1: Theoretical description of the phase-controlled FTS

### Phase-controlled delay line with a galvanometric scanner

Theoretical description of the phase-controlled delay line is provided as follows. The detailed schematic of the phase-controlled delay line with a galvanometric scanner is depicted in Supplementary Figure 1a. In this configuration, the grating equation may be described as:

$$\sin\beta_\lambda = N\lambda - \sin\alpha, \quad (1)$$

$$\sin\beta_{\lambda_0} = N\lambda_0 - \sin\alpha, \quad (2)$$

where  $\beta_\lambda$  and  $\beta_{\lambda_0}$  denote the first-order diffraction angles of the light at wavelength of  $\lambda$  and  $\lambda_0$ ,  $\alpha$  incident angle,  $N$  groove density of the grating. Here,  $\lambda_0$  denotes the wavelength corresponding to the pivot position of the scanning mirror in the Fourier plane. Assuming the facet of the scanning mirror is on the Fourier plane at  $t = 0$ , an optical path length difference  $L_g(t)$  between the beams at the wavelength of  $\lambda$  and  $\lambda_0$  is described as:

$$L_g(t) = l_f(\tan\beta_{\lambda_0} - \tan\beta_\lambda) \tan \omega t, \quad (3)$$

where  $l_f$  denotes the focal length of the curved mirror and  $\omega$  the angular frequency of the scanning mirror. When  $\beta_{\lambda_0}, \beta_\lambda \ll 1$  and  $\omega t \ll 1$ ,  $L_g(t)$  is described as:

$$\begin{aligned} L_g(t) &\approx l_f N (\lambda_0 - \lambda) \omega t \\ &\approx l_f N c \left( \frac{\nu - \nu_0}{\nu_0 \nu} \right) \omega t, \end{aligned} \quad (4)$$

where  $c$  is the speed of light,  $\nu$  and  $\nu_0$  the optical frequency corresponding to  $\lambda$  and  $\lambda_0$ . Then, the spectral phase  $\phi_g(\nu)$  may be described as:

$$\begin{aligned} \phi_g(\nu) &= -\frac{2\pi\nu}{c} \times 4 \times L_g(t) \\ &\approx -2\pi \frac{4l_f N \omega}{\nu_0} (\nu - \nu_0) t \\ &= -2\pi c_g (\nu - \nu_0) t, \end{aligned} \quad (5)$$

where  $c_g = \frac{4l_f N \omega}{\nu_0}$  is the down conversion factor. Since the light is reflected off the scanning mirror twice in the delay line, the total optical path length difference is  $L_g(t)$  multiplied by 4. The group delay  $\tau_g$  may be described as:

$$\tau_g = -\frac{1}{2\pi} \frac{\partial \phi_g(\nu)}{\partial \nu} = c_g t. \quad (6)$$

27

## 28 Phase-controlled FTS with a galvanometric scanner

29 We denote complex electric fields of an input and two outputs of the Michelson interferometer as  $E(t)$ ,  $E_{\text{scan}}(t)$   
 30 and  $E_{\text{ref}}(t)$ , and their Fourier-transformed fields as  $E(\nu)$ ,  $E_{\text{scan}}(\nu)$  and  $E_{\text{ref}}(\nu)$ , respectively. In the frequency  
 31 domain,  $E_{\text{ref}}(\nu)$  and  $E_{\text{scan}}(\nu)$  may be described by adding the spectral phase to  $E(\nu)$  as:

$$E_{\text{ref}}(\nu) = E(\nu) \exp(-i2\pi\nu\tau), \quad (7)$$

$$\begin{aligned} E_{\text{scan}}(\nu) &= E(\nu) \exp\left[i\left\{-2\pi\nu\tau + \phi_g(\nu)\right\}\right] \\ &= E(\nu) \exp[-i2\pi\{\nu\tau + (\nu - \nu_0)\tau_g\}], \end{aligned} \quad (8)$$

32 where  $\tau$  denotes a delay added by the reference and scan arm of the interferometer, and  $\tau_g$  the group delay added  
 33 by the delay line in the scan arm. By inverse-Fourier-transforming  $E_{\text{ref}}(\nu)$  and  $E_{\text{scan}}(\nu)$ , the complex electric  
 34 fields  $E_{\text{ref}}(t)$  and  $E_{\text{scan}}(t)$  are described as:

$$\begin{aligned} E_{\text{ref}}(t) &= \mathcal{F}^{-1}\{E_{\text{ref}}(\nu)\} \\ &= \int_{-\infty}^{\infty} E(\nu) \exp\{i2\pi\nu(t - \tau)\} d\nu \\ &= E(t - \tau), \end{aligned} \quad (9)$$

$$\begin{aligned} E_{\text{scan}}(t) &= \mathcal{F}^{-1}\{E_{\text{scan}}(\nu)\} \\ &= \exp(i2\pi\nu_0\tau_g) \int_{-\infty}^{\infty} E(\nu) \exp\{i2\pi\nu(t - \tau - \tau_g)\} d\nu \\ &= \exp(i2\pi\nu_0\tau_g) E(t - \tau - \tau_g). \end{aligned} \quad (10)$$

35 Integrated intensity of the combined electric fields of  $E_{\text{ref}}(t)$  and  $E_{\text{scan}}(t)$  detected by a photodetector can be  
 36 written as:

$$\begin{aligned} I(\tau_g) &= \int_{-\infty}^{\infty} |E_{\text{ref}}(t) + E_{\text{scan}}(t)|^2 dt \\ &= \int_{-\infty}^{\infty} |E(t) + \exp(i2\pi\nu_0\tau_g) E(t - \tau_g)|^2 dt. \end{aligned} \quad (11)$$

37 Here,  $t - \tau$  is replaced by  $t$  for simplicity of the equation. The AC component of  $I(\tau_g)$ , namely the  
 38 interferogram  $S(\tau_g)$ , is described as:

$$S(\tau_g) = \exp(i2\pi\nu_0\tau_g) \int_{-\infty}^{\infty} E^*(t) E(t - \tau_g) dt + c. c.. \quad (12)$$

39 Finally, Fourier-transforming the interferogram gives the spectrum:

$$\begin{aligned} \mathcal{F}\{S(\tau_g)\} &= \int_{-\infty}^{\infty} S(\tau_g) \exp(-i2\pi\nu\tau_g) d\tau_g \\ &= \int_{-\infty}^{\infty} \exp\{-i2\pi(\nu - \nu_0)\tau_g\} s(\tau_g) d\tau_g + c. c. \\ &= B(\nu - \nu_0) + c. c.. \end{aligned} \quad (13)$$

40 Here,  $s(\tau_g) = \int_{-\infty}^{\infty} E^*(t)E(t - \tau_g)dt$  and  $B(\nu) = \mathcal{F}\{s(\tau_g)\}$ . As shown above, the spectrum is shifted by  $\nu_0$ , which  
 41 is experimentally demonstrated by changing the pivot position of the scanning mirror in the Fourier plane.

42

### 43 **Phase-controlled FTS with a polygonal scanner**

44 Unlike a galvanometric scanner, a polygonal scanner does not have the pivot in the Fourier plane (Supplementary  
 45 Figure 1b). Therefore, the delay line based on the polygonal scanner is described in a different manner. In this  
 46 configuration, the optical path length difference  $L_p(t)$  added by the delay line may be described as:

$$\begin{aligned} L_p(t) &\approx \left\{ l_f N (\lambda_0 - \lambda) - R \tan \frac{\omega t}{2} \right\} \tan \omega t \\ &\approx l_f N c \left( \frac{\nu - \nu_0}{\nu_0 \nu} \right) \omega t - R \frac{\omega^2 t^2}{2}, \end{aligned} \quad (14)$$

47 where  $R$  denotes the inner radius of the polygonal scanner that equals to the distance between the pivot and the  
 48 mirror facets. The added spectral phase  $\phi_p(\nu)$  may be described as:

$$\begin{aligned} \phi_p(\nu) &= -\frac{2\pi\nu}{c} \times 4 \times L_p(t) \\ &\approx -2\pi \frac{4l_f N \omega}{\nu_0} (\nu - \nu_0) t + 2\pi \frac{2R\omega^2 \nu}{c} t^2 \\ &= -2\pi \left\{ \left( \frac{4l_f N \omega}{\nu_0} - \frac{2R\omega^2}{c} t \right) \nu - 4l_f N \omega \right\} t \\ &= -2\pi \left( \frac{4l_f N \omega}{\nu_0} - \frac{2R\omega^2}{c} t \right) \left( \nu - \frac{\nu_0}{1 - \frac{R\omega\nu_0}{2cl_f N} t} \right) t \\ &= -2\pi c_p (\nu - \nu'_0) t, \end{aligned} \quad (15)$$

49 where  $c_p = \left( \frac{4l_f N \omega}{\nu_0} - \frac{2R\omega^2}{c} t \right)$  denotes the down conversion factor and  $\nu'_0 = \frac{\nu_0}{1 - \frac{R\omega\nu_0}{2cl_f N} t}$  the optical frequency

50 corresponding to the intersection point of the scanner's facet on the Fourier plane. Note that the above expressions  
 51 become identical to those with the galvanometric scanner shown in the previous section with  $R = 0$ . The group  
 52 delay  $\tau_p$  may be described as:

$$\tau_p = -\frac{1}{2\pi} \frac{\partial \phi_p(\nu)}{\partial \nu} = c_p t. \quad (16)$$

53 In the frequency domain,  $E_{\text{scan}}(\nu)$  may be described as:

$$E_{\text{scan}}(\nu) = E(\nu) \exp\{-i2\pi(\nu - \nu'_0)\tau_p\}, \quad (17)$$

54 Here, we omit  $\tau$  for simplicity of the equation. Then,  $E_{\text{scan}}(t)$  is written as:

$$\begin{aligned} E_{\text{scan}}(t) &= \exp(i2\pi\nu'_0\tau_p) \int_{-\infty}^{\infty} E(\nu) \exp\{i2\pi\nu(t - \tau_p)\} d\nu \\ &= \exp(i2\pi\nu'_0\tau_p) E(t - \tau_p). \end{aligned} \quad (18)$$

55 Therefore, the interferogram  $S(\tau_p)$  is written as:

$$S(\tau_p) = \int_{-\infty}^{\infty} E^*(t)E(t - \tau_p)\exp(i2\pi\nu'_0\tau_p)dt + c.c.. \quad (19)$$

56 Since  $\tau_p$  and  $\nu'_0$  are temporally nonlinear variables, phase correction is necessary to retrieve the spectrum.

57

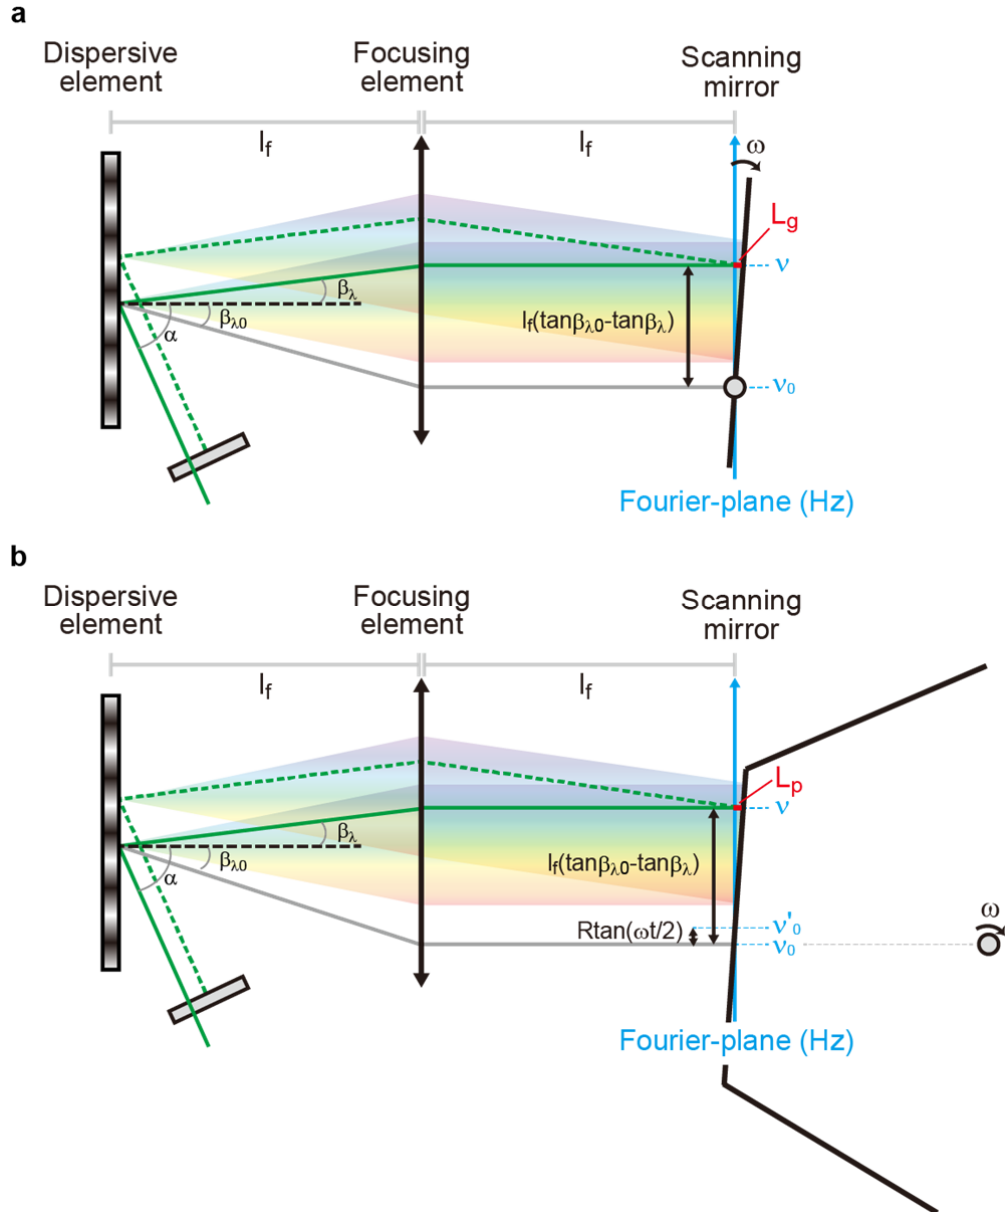

58

59 **Supplementary Figure 1| Detailed schematic of the phase-controlled delay line. a,** Schematic of the  
 60 phase-controlled delay line with a galvanometric scanner. **b,** Schematic of the phase-controlled delay line with a  
 61 polygonal scanner.

62

63

64

65

66 **Supplementary Note 2: Trade-off relation among the scan rate, spectral bandwidth and resolution**

67 **Phase-controlled FTS with a galvanometric scanner**

68 A trade-off relation among the scan rate, spectral bandwidth and resolution of the phase-controlled FTS with a  
69 galvanometric scanner can be derived as follows. A down-converted radio frequency  $f(\nu)$  may be described as:

$$f(\nu) = \frac{4l_f N \omega}{\nu_0} (\nu - \nu_0) = c_g (\nu - \nu_0), \quad (20)$$

70 where  $c_g$  denotes the down conversion factor,  $\nu_0$  the optical frequency corresponding to the pivot position of the  
71 scanning mirror in the Fourier plane. All the spectral elements  $f(\nu)$  of the measured light must be within the  
72 Nyquist range of the system to avoid the aliasing effect:

$$0 \leq f(\nu) < \frac{f_s}{2}, \quad (21)$$

73 where  $f_s$  is a sampling rate of the system, which can be determined by either an optical or electrical sampling rate,  
74 namely the repetition rate of the pulsed laser or the clock rate of the digitizer, respectively. For fully utilizing the  
75 Nyquist range, we set  $\nu_0$  at the edge of the measured optical spectrum. Thus, the trade-off relation may be  
76 described with an optical bandwidth of the spectrum  $\Delta\nu$  as:

$$c_g \Delta\nu < \frac{f_s}{2}. \quad (22)$$

77 The spectral resolution  $\delta\nu$  determined by the maximum group delay  $\tau_{g,\max}$  is described as:

$$\delta\nu = \frac{1}{\tau_{g,\max}} = \frac{f_{\text{scan}}}{c_g}, \quad (23)$$

78 where  $f_{\text{scan}}$  denotes the scan rate. Finally, the trade-off relation among the scan rate, spectral bandwidth and  
79 resolution can be described as:

$$f_{\text{scan}} \Delta\nu \frac{1}{\delta\nu} < \frac{f_s}{2}. \quad (24)$$

80

81 **Phase-controlled FTS with a polygonal scanner**

82 When using a polygonal scanner as a scanning mirror, the above expressions are modified as follows. The  
83 down-converted radio frequency of the spectrum may be described as:

$$f(\nu) = \frac{4l_f N \omega}{\nu_0} (\nu - \nu_0) - \frac{2R\omega^2}{c} \nu t. \quad (25)$$

84 All the spectral elements  $f(\nu)$  must be in the Nyquist range of the system for avoiding the aliasing effect:

$$0 \leq \frac{4l_f N \omega}{\nu_0} (\nu - \nu_0) - \frac{2R\omega^2}{c} \nu t < \frac{f_s}{2}. \quad (26)$$

85 This configuration allows us to use a part of the measurement time in order to avoid the aliasing effect. To consider  
86 the duty cycle  $D$ , we introduce  $t_{\text{start}}$  and  $t_{\text{end}}$  ( $-\frac{1}{f_{\text{scan}}} < t_{\text{start}}, t_{\text{end}} \leq 0$ ) for expressing the start and end time of

87 the single interferogram, respectively. The duty cycle may be written as:

$$D = (t_{\text{end}} - t_{\text{start}}) f_{\text{scan}}. \quad (27)$$

88 Assuming the spectrum spanning from  $\nu_0$  to  $\nu_0 + \Delta\nu$  mapped on the Fourier plane,  $t_{\text{start}}$  and  $t_{\text{end}}$  must satisfy  
 89 the following inequalities:

$$t_{\text{start}} > \frac{c}{2R\omega^2} \frac{1}{(\nu_0 + \Delta\nu)} \left( \frac{4l_f N \omega}{\nu_0} \Delta\nu - \frac{f_s}{2} \right), \quad (28)$$

$$t_{\text{end}} \leq 0. \quad (29)$$

90 Note that since the frequency of each spectral element decreases in time, the highest available frequency  $\frac{f_s}{2}$   
 91 determines the start time  $t_{\text{start}}$ , while the lowest frequency zero the end time  $t_{\text{end}}$ . Here, we consider a case where  
 92  $t_{\text{end}} = 0$  so that we have the longest duty cycle. Supplementary Inequality 28 can be described as:

$$c_p(t_{\text{start}})\Delta\nu + \frac{2R\omega^2}{c} \nu_0 \frac{D}{f_{\text{scan}}} < \frac{f_s}{2}. \quad (30)$$

93 where  $c_p(t_{\text{start}}) = \frac{4l_f N \omega}{\nu_0} - \frac{2R\omega^2}{c} t_{\text{start}}$ . The spectral resolution  $\delta\nu$ , which is an inverse of the group delay during the  
 94 time between  $t_{\text{start}}$  and  $t_{\text{end}}$ , may be written as:

$$\begin{aligned} \delta\nu &= \frac{1}{c_p(t_{\text{end}})t_{\text{end}} - c_p(t_{\text{start}})t_{\text{start}}} \\ &= \frac{f_{\text{scan}}}{c_p(t_{\text{start}})D}. \end{aligned} \quad (31)$$

95 Finally, the trade-off relation is described as:

$$\frac{f_{\text{scan}}}{D} \Delta\nu \frac{1}{\delta\nu} + \frac{8\pi^2 R \nu_0 f_{\text{scan}}}{c P^2} D < \frac{f_s}{2}. \quad (32)$$

96 Here we express the angular frequency of the scanner as  $\omega = \frac{2\pi f_{\text{scan}}}{P}$ , where  $P$  denotes the number of facets of the  
 97 scanner. This trade-off relation clearly shows that the nonlinear phase delay broadens the down-converted RF  
 98 spectrum, leading to slight reduction of the efficiency on the trade-off relation. Note that Supplementary Inequality  
 99 32 equals to Supplementary Inequality 24 with  $D = 1$  and  $R = 0$ .

100

101 While the Supplementary Inequality 28 gives a constraint on  $t_{\text{start}}$  caused by the sampling frequency, the  
 102 geometry of the polygonal scanner also gives another constraint on  $t_{\text{start}}$ . Since the corners of the polygonal mirror  
 103 interrupt the scan for one end of the spectrum earlier than for the other end, it gives an additional constraint as:

$$\begin{aligned} t_{\text{start}} &\leq \frac{-\frac{\pi}{P} + \tan^{-1} \left\{ \frac{c l_f N}{R} \left( \frac{1}{\nu_0} - \frac{1}{\nu_0 + \Delta\nu} \right) \right\}}{\omega} \\ &\approx -\frac{\pi}{2\pi f_{\text{scan}}} + \frac{c l_f N P}{R 2\pi f_{\text{scan}}} \left( \frac{1}{\nu_0} - \frac{1}{\nu_0 + \Delta\nu} \right). \end{aligned} \quad (33)$$

104 In this case, the duty cycle can be described as:

$$D \leq \frac{1}{2} - \frac{P c l_f N}{2\pi R} \left( \frac{1}{\nu_0} - \frac{1}{\nu_0 + \Delta\nu} \right). \quad (34)$$

105

106 **Supplementary Note 3: Signal-to-noise ratio.**

107 We evaluate the SNR of single spectra measured by the PC-FTS under the experimental condition of the  
108 measurement shown in Fig. 5. Dominant noises are categorized as the detector noise, shot noise and relative  
109 intensity noise (RIN) of the light source<sup>1</sup>. In our experiment, an average power irradiated onto the balanced detector  
110 is 15  $\mu\text{W}$  for each photodiode, which is limited by the detector nonlinearity. From the noise equivalent power  
111 (NEP) of our balanced detector (ca.  $4.7 \text{ pW Hz}^{-\frac{1}{2}}$ ), the SNR dominated by the detector noise is estimated to be 82,  
112 while that of the shot noise to be 130. From the measured RIN of our mode-locked laser ( $-143 \text{ dB Hz}^{-1}$ ), the SNR  
113 dominated by the RIN is estimated to be 255. Therefore, the SNR of our measurement shown in Fig.5 is dominated  
114 by the detector noise, and using a detector with a lower NEP could increase the SNR. The overall SNR including all  
115 the noises is evaluated to be 66, which is in good agreement with the experimentally measured value of 54. Let us  
116 now consider the case using the SLD instead of the mode-locked laser. In this case, relatively larger RIN would  
117 dominate the SNR. The measured RIN of our SLD is  $-124 \text{ dB Hz}^{-1}$ , that leads to the SNR of 29 under the  
118 experimental condition of the measurement shown in Fig. 5. In addition, the SLD used in our experiment generates  
119 a strong ripple noise due to the multiple reflections on the chip surfaces. However, the ripple noise is not a  
120 fundamental noise associated to the PC-FTS, which can be eliminated with a proper surface treatment of the chip.

121

122

123 **Supplementary Note 4: Spectrum of the fibre laser**

124 The spectrum of the fibre laser used for the measurements of Fig. 4 and 5 is shown in Supplementary Figure 2. The  
125 spectrum is measured by an optical spectrum analyzer at a spectral resolution of 0.1 nm that corresponds to 12 – 13  
126 GHz.

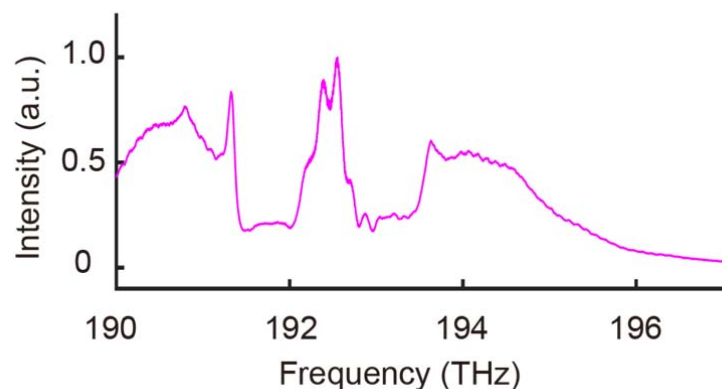

127

128

**Supplementary Figure 2| Spectrum of the fibre laser.**

129

130

131 **Supplementary References**

132 1. Newbury, N. R., Coddington, I. & Swann, W. Sensitivity of coherent dual-comb spectroscopy. *Optics Express* **18**,  
133 7929-7945 (2010).
